# Supplementary material
Source: MDPI journal article supplement (https://www.mdpi.com/2071-1050/12/23/10103)
Supplement: s1 [file s1]

## Sheet: Sheet1
	Table S1 Pearson correlation analysis among different indicators
		Biomass A	Biomass B	Na+ A	Na+ B	K+ A	K+ B	K+/Na+ A	K+/Na+ B	Height	Roots/shoots	Pn	Gs	E	WUE
	Biomass A	1	0.94**	-0.48	-0.775654	-0.511387	0.0947116	-0.159929	0.780038	0.598252	-0.772844	0.00820713	0.00497535	-0.165102	0.209883
			2.34483e-07	0.0715048	0.00067788	0.0513662	0.73706	0.569116	0.00060313	0.0184776	0.000729618	0.976842	0.98596	0.556517	0.452786
	Biomass B	0.938197	1	-0.434956	-0.747415	-0.52476	-0.0984617	-0.214459	0.680646	0.589481	-0.595373	-0.15052	-0.119004	-0.288088	0.141668
		2.34483e-07		0.105167	0.00136015	0.0445992	0.727009	0.442764	0.00522272	0.0207416	0.0191988	0.592335	0.672717	0.29776	0.61452
	Na+ A	-0.478018	-0.434956	1	0.420045	0.617591	0.11877	-0.0880526	-0.566734	0.0892291	0.166893	0.043981	-0.0420973	0.0498399	-0.180821
		0.0715048	0.105167		0.119036	0.0141573	0.673327	0.755005	0.0276028	0.751825	0.552183	0.876321	0.881584	0.859987	0.518986
	Na+ B	-0.775654	-0.747415	0.420045	1	0.546536	0.17154	0.331257	-0.886458	-0.445456	0.727981	0.0936149	0.223709	0.361164	-0.484947
		0.00067788	0.00136015	0.119036		0.0350238	0.541004	0.227788	1.07543e-05	0.0961042	0.00209129	0.740007	0.422846	0.185965	0.0669204
	K+ A	-0.511387	-0.52476	0.617591	0.546536	1	0.0756387	0.713488	-0.599393	-0.0177171	0.301289	0.421881	0.499981	0.545447	-0.400869
		0.0513662	0.0445992	0.0141573	0.0350238		0.788764	0.00281909	0.0181976	0.95003	0.275157	0.117264	0.0577097	0.0354623	0.138657
	K+ B	0.0947116	-0.0984617	0.11877	0.17154	0.0756387	1	-0.04565	0.101022	0.452557	-0.419463	-0.0246229	0.0643207	0.0683552	-0.00638916
		0.73706	0.727009	0.673327	0.541004	0.788764		0.871663	0.72017	0.0902947	0.119602	0.930589	0.819851	0.808739	0.981971
	K+/Na+ A	-0.159929	-0.214459	-0.0880526	0.331257	0.713488	-0.04565	1	-0.302951	-0.101202	0.206544	0.506785	0.718539	0.682027	-0.387087
		0.569116	0.442764	0.755005	0.227788	0.00281909	0.871663		0.272385	0.719689	0.460172	0.0538609	0.00254551	0.00509675	0.154039
	K+/Na+ B	0.780038	0.680646	-0.566734	-0.886458	-0.599393	0.101022	-0.302951	1	0.459328	-0.685335	-0.0595161	-0.260659	-0.391501	0.569472
		0.00060313	0.00522272	0.0276028	1.07543e-05	0.0181976	0.72017	0.272385		0.0849917	0.00480483	0.833127	0.348086	0.148994	0.0266968
	Height	0.598252	0.589481	0.0892291	-0.445456	-0.0177171	0.452557	-0.101202	0.459328	1	-0.674283	-0.338695	-0.197623	-0.322771	0.0362421
		0.0184776	0.0207416	0.751825	0.0961042	0.95003	0.0902947	0.719689	0.0849917		0.00583519	0.21688	0.480187	0.240645	0.897968
	roots/shoots	-0.772844	-0.595373	0.166893	0.727981	0.301289	-0.419463	0.206544	-0.685335	-0.674283	1	-0.00522967	-0.0323065	0.0879755	-0.266913
		0.000729618	0.0191988	0.552183	0.00209129	0.275157	0.119602	0.460172	0.00480483	0.00583519		0.985242	0.909003	0.755213	0.336215
	Pn	0.00820713	-0.15052	0.043981	0.0936149	0.421881	-0.0246229	0.506785	-0.0595161	-0.338695	-0.00522967	1	0.810025	0.819586	-0.23919
		0.976842	0.592335	0.876321	0.740007	0.117264	0.930589	0.0538609	0.833127	0.21688	0.985242		0.00025144	0.000184222	0.390574
	Gs	0.00497535	-0.119004	-0.0420973	0.223709	0.499981	0.0643207	0.718539	-0.260659	-0.197623	-0.0323065	0.810025	1	0.979143	-0.611952
		0.98596	0.672717	0.881584	0.422846	0.0577097	0.819851	0.00254551	0.348086	0.480187	0.909003	0.00025144		2.22238e-10	0.0153265
		0.579875	0.869973	0.0418896	0.985231	0.962645	0.159268	0.113868	0.629275	0.331389	0.318773	0.586096	0.162138	0.282792	8.81394e-06
	E	-0.165102	-0.288088	0.0498399	0.361164	0.545447	0.0683552	0.682027	-0.391501	-0.322771	0.0879755	0.819586	0.979143	1	-0.643606
		0.556517	0.29776	0.859987	0.185965	0.0354623	0.808739	0.00509675	0.148994	0.240645	0.755213	0.000184222	2.22238e-10		0.0096279
	WUE	0.209883	0.141668	-0.180821	-0.484947	-0.400869	-0.00638916	-0.387087	0.569472	0.0362421	-0.266913	-0.23919	-0.611952	-0.643606	1
		0.452786	0.61452	0.518986	0.0669204	0.138657	0.981971	0.154039	0.0266968	0.897968	0.336215	0.390574	0.0153265	0.0096279
	note: ** indicate extreme significant correlation (P <0.01)
